# Supplementary material for: Acteoside attenuates hydrogen peroxide-induced injury of retinal ganglion cells via the CASC2/miR-155/mTOR axis
Source: PubMed Central journal article supplement — Ann Transl Med. 2022 Jan;10(1):5. doi: 10.21037/atm-21-5630 (PMC8825554; doi:10.21037/atm-21-5630), 2022-01
Supplement: atm-10-01-5-dss.pdf [file atm-10-01-5-dss.pdf]

## Data Sharing Statement

|                     |                                                                                                                                                     |                                                                                                                  |
|---------------------|-----------------------------------------------------------------------------------------------------------------------------------------------------|------------------------------------------------------------------------------------------------------------------|
| <b>Article Info</b> | https://dx.doi.org/10.21037/atm-21-5630                                                                                                             |                                                                                                                  |
| <b>Item</b>         | <b>Question</b>                                                                                                                                     | <b>Authors' Response<br/>(place "-" if not applicable)</b>                                                       |
| 1                   | Would you like to share data collected for your study to others?                                                                                    | Yes.                                                                                                             |
| 2                   | If not, would you like to share the reason for your decision?                                                                                       |                                                                                                                  |
| 3                   | What data in particular will be shared?                                                                                                             | The cell viability, RT-qPCR, Westren blot, ELISA assays data.                                                    |
| 4                   | Any other documents will be shared? Such as study protocol, statistical analysis plan, informed consent form, clinical study report, analytic code. | Study protocol and statistical analysis plan will be shared.                                                     |
| 5                   | When will data availability begin?                                                                                                                  | From the publication date.                                                                                       |
| 6                   | When will data availability end?                                                                                                                    | Two years within the publication date.                                                                           |
| 7                   | To whom will you share the data?                                                                                                                    | Neurodegenerative eye disease researcher who are interested in studies of retinal ganglion cell loss.            |
| 8                   | For what type of analysis or purpose?                                                                                                               | For analysis to evaluate the effects of acteoside in RGC apoptosis.                                              |
| 9                   | How or where can the data/documents be obtained?                                                                                                    | Emails could be sent to the address below to obtain the shared data: li_yan_km@163.com                           |
| 10                  | Any other restrictions?                                                                                                                             | We may balance the potential benefits and risks for each request and then provide the data that could be shared. |
